# Supplementary material
Source: publisher figshare collection journal article supplement (https://aacr.figshare.com/articles/dataset/_/22820125)
Supplement: Supplementary file 1 [file 40570282]

Supplementary Figure 3

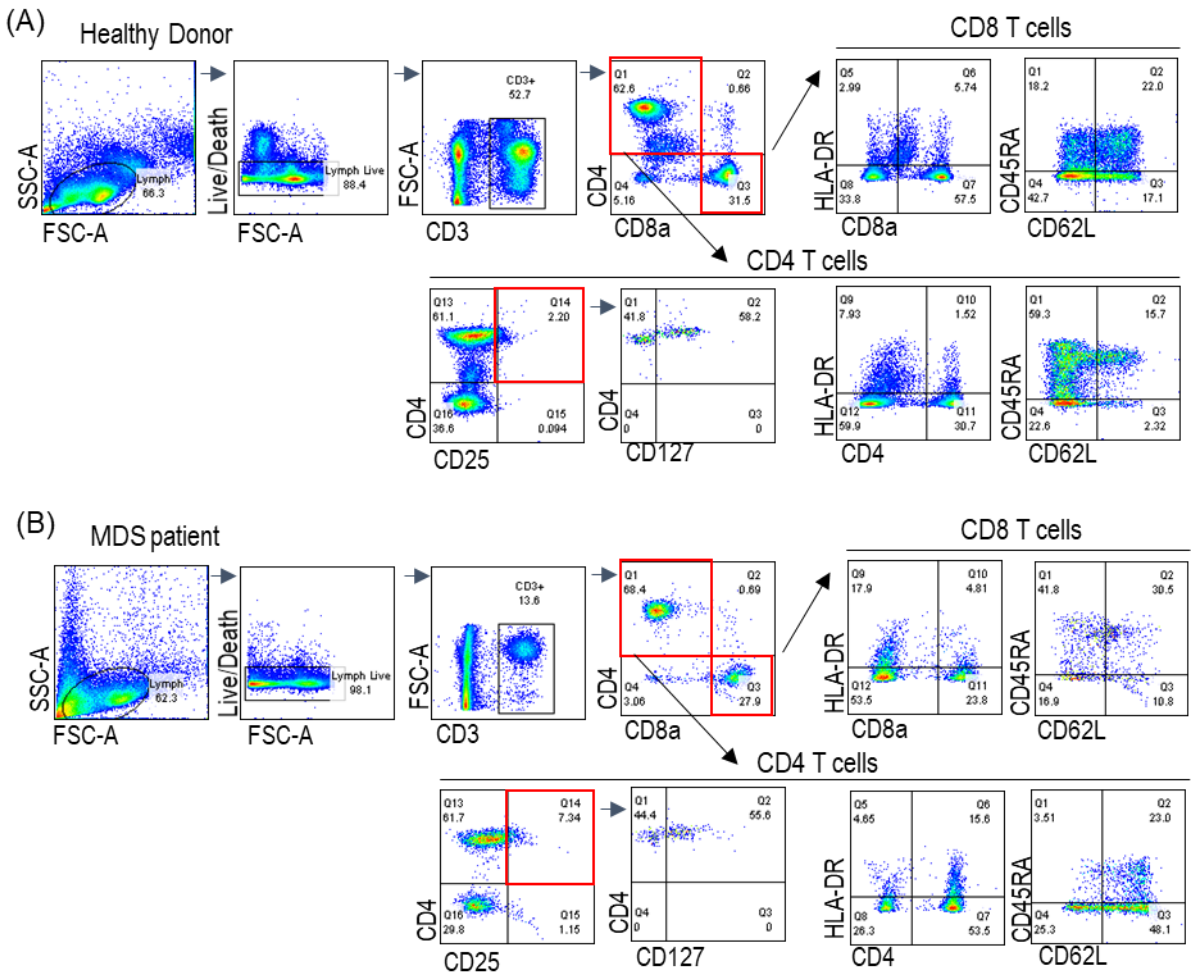

Figure S3. Flow-cytometry gating strategy. CD, cluster of differentiation, Treg, regulatory T cell
